# Supplementary material for: Prognostic value of intra‐tumoral CD8+/FoxP3+ lymphocyte ratio in patients with resected colorectal cancer liver metastasis
Source: PubMed Central journal article supplement — J Surg Oncol. 2018 Jun 7;118(1):68–76. doi: 10.1002/jso.25091 (PMC6175125; doi:10.1002/jso.25091), 2018-06-07
Supplement: JSO-118-68-s001.pdf [file JSO-118-68-s001.pdf]

## Supplementary information

Prognostic role of intratumoral CD8<sup>+</sup>/FoxP3<sup>+</sup> lymphocyte ratio in patients with resected colorectal cancer liver metastasis

Kostandinos Sideras, Boris Galjart, Angela Vasaturo, Alexander Pedroza-Gonzalez, Katharina Biermann, Shanta Mancham, Alex L. Nigg, Bettina Hansen, Hans J.A. Stoop, Guoying Zhou, , Cornelis Verhoef, Stefan Sleijfer, Dave Sprengers, Jaap Kwekkeboom, Marco J. Bruno

### Table of contents

|                        |   |
|------------------------|---|
| Supplementary methods  | 2 |
| Supplementary figure 1 | 3 |
| Supplementary figure 2 | 4 |

## Supplementary methods

### TIL isolation

Single cell TILs were isolated from tumor tissue via tissue digestion as previously described [1, 2]. Briefly, fresh tumor tissue was cut into small pieces and digested with 0.5 mg/mL of collagenase (Sigma-Aldrich, St. Louis, MO) and 0.1 mg/mL of DNase I (Roche, Indianapolis, IN) for 30 minutes at 37 °C. Cell suspensions were filtered through cell strainers and mononuclear cells were obtained by Ficoll density gradient centrifugation. Viability was determined by trypan blue exclusion.

### Flow Cytometry Analysis

Mononuclear cells isolated from tumor tissue were analyzed for expression of surface and intracellular markers using the following anti-human antibodies: PerCP-labeled anti-CD8 (SK-1) and APC-H7-labeled anti-CD4 (SK3) from BD Biosciences (Erembodegem, Belgium); APC-labeled anti-FoxP3 (PCH101), PeCy7-labeled anti-CD3 (UCTH1), eFluor®450-labeled anti-CD45 (HI30) and eFluor®450-labeled anti-CD25 (BC96) from e-bioscience (Vienna, Austria). Cells were incubated with the antibodies for 30 min at 4 °C in the dark, then washed and fixed with 1% paraformaldehyde. For the intracellular FoxP3 staining, cells were incubated with the FoxP3 antibody using the nuclear staining buffer set from e-biosciences. Dead cells were excluded by using the LIVE/DEAD fixable dead cell stain kit with aqua fluorescent reactive dye (Invitrogen, Paisley, UK). Cells were analyzed in a FACSCanto II system (BD Biosciences, San Diego, CA). The gating strategy has been previously described [1]. Numbers of CD8+ TILs were defined as the proportion of CD8+ cells within live CD45+ cells, while numbers of T-regulatory cells were defined as the proportion of CD4+ CD25+ FoxP3+ within live CD45+ cells.

### References

1. Pedroza-Gonzalez A, Verhoef C, Ijzermans JN et al. Activated tumor-infiltrating CD4+ regulatory T cells restrain antitumor immunity in patients with primary or metastatic liver cancer. *Hepatology* 2013; 57: 183-194.
2. Pedroza-Gonzalez A, Zhou G, Singh SP et al. GITR engagement in combination with CTLA-4 blockade completely abrogates immunosuppression mediated by human liver tumor-derived regulatory T cells ex vivo. *Oncoimmunology* 2015; 4: e1051297.

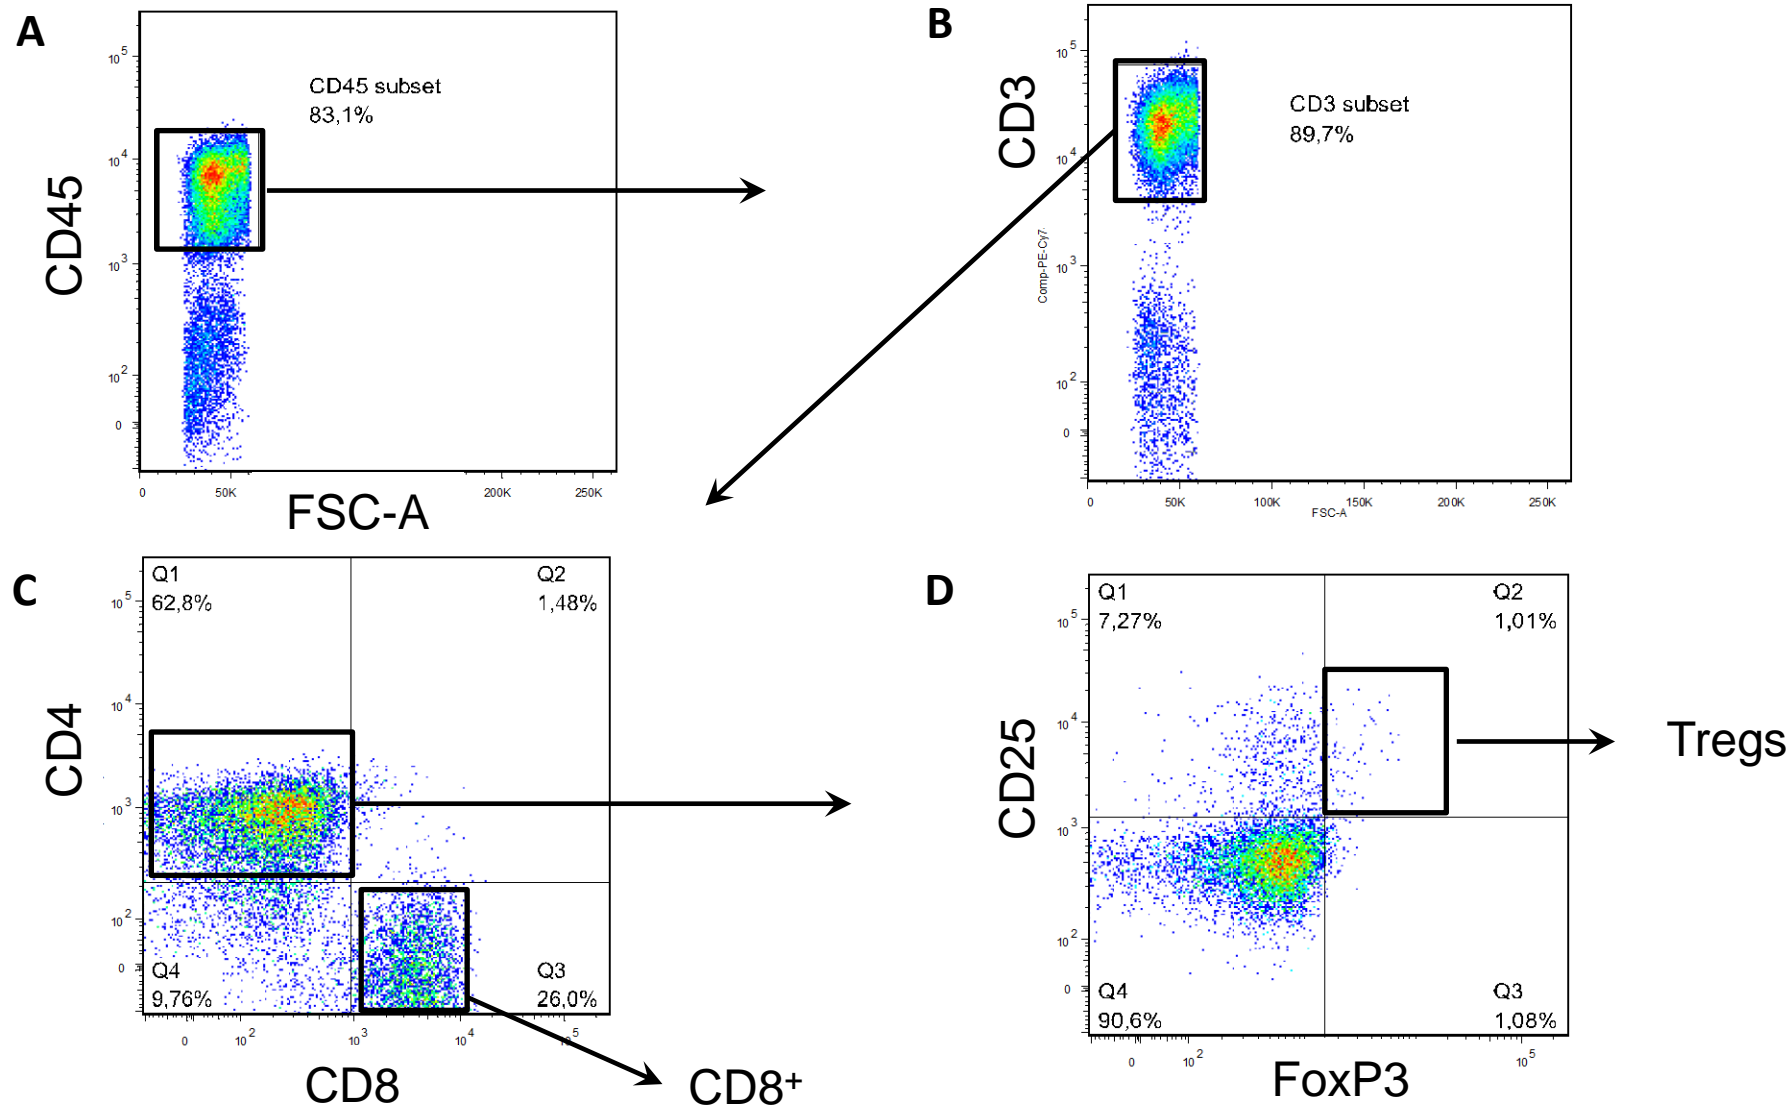

Supplementary Figure. 1. Flow cytometric analysis of intra-tumoral lymphocytes from patients with colorectal cancer liver metastasis. (A) Viable (aqua dye-negative) leukocytes were gated based on CD45 expression. (B) T cells were defined based on the expression of CD3. (C) CD3<sup>+</sup> T cells were further analyzed for CD4 and CD8. (D) Percentages of Treg cells were then defined as CD4<sup>+</sup> CD25<sup>+</sup> FoxP3<sup>+</sup>.

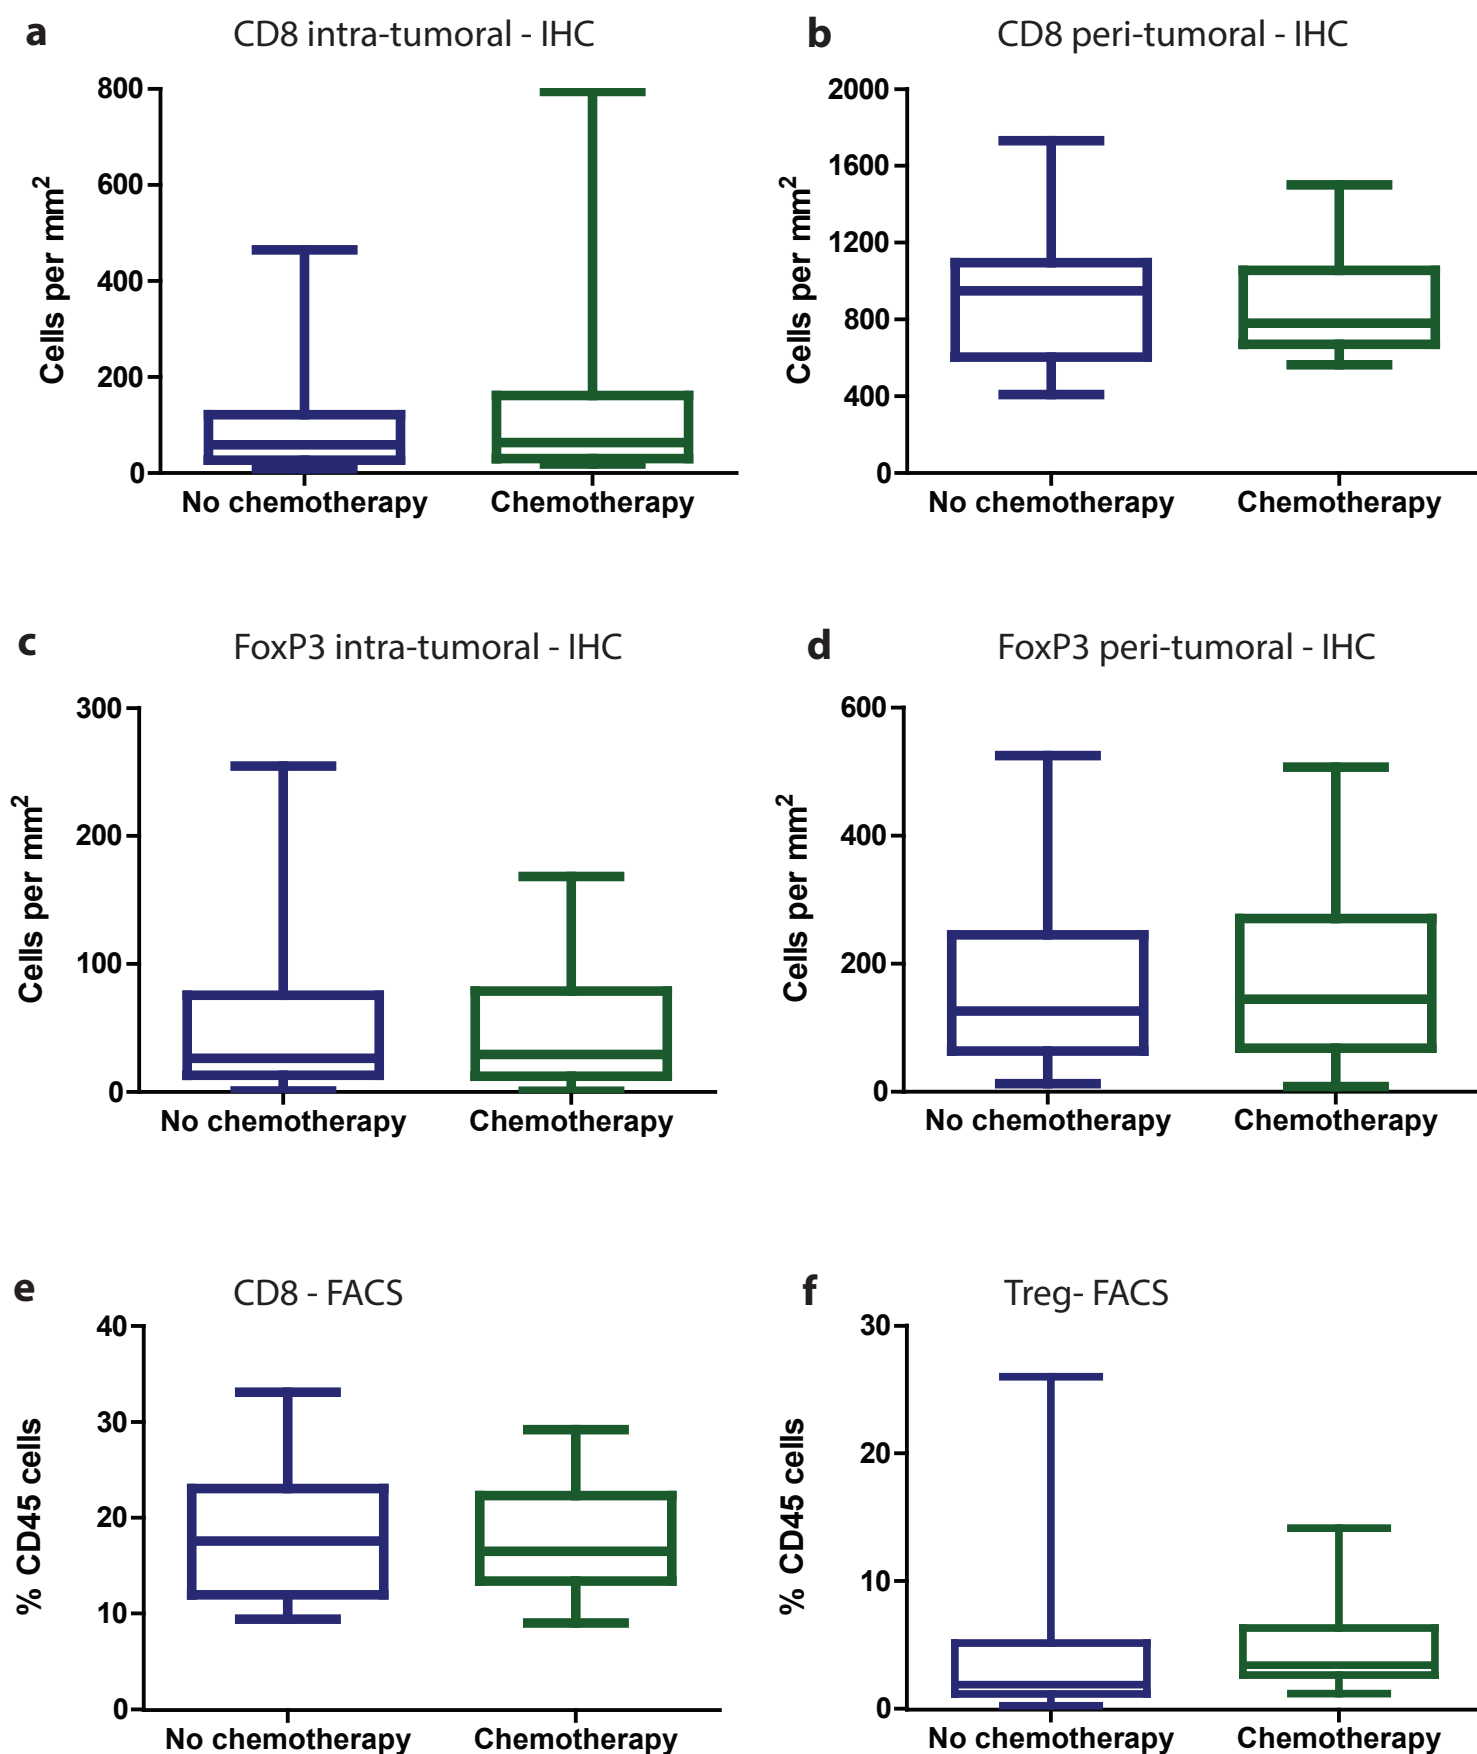

**Supplementary Figure 2: Box-plots of TIL populations in relation to whether patients received (n=17) or did not receive (n=30) prior systemic chemotherapy.** Note that no patient received chemotherapy in the 3 month period prior to tumor resection. Also, note that the x-axis range differs based on the population. **a)** CD8 intra-tumoral TIL population by IHC, **b)** CD8 peri-tumoral TIL population by IHC, **c)** FoxP3 intra-tumoral TIL population by IHC, **d)** FoxP3 peri-tumoral TIL population by IHC, **e)** CD8 TIL population by flow cytometry, **f)** CD4/CD25/FoxP3 TIL population by flow cytometry.
